# Supplementary material for: Amino-terminated hyper-branched polyamidoamine polymer grafted magnetic graphene oxide nanosheets as an efficient sorbent for the extraction of selective serotonin reuptake inhibitors from plasma samples
Source: Royal Society of Chemistry journal article supplement (doi:10.1039/c7ay01166k), 2017-01-01
Supplement: c7ay01166k1.pdf [file c7ay01166k1.pdf]

## Electronic Supplementary Material

### Amino-terminated hyperbranched polyamidoamine polymers Grafted Magnetic Graphene Oxide Nanosheets as Efficient Sorbent for Extraction of Selective Serotonin Reuptake Inhibitors from Plasma Sample

Table S1 Characteristics of selective serotonin reuptake inhibitors drugs.

| Analytes    | Molecular structure                                                                 | Molar mass (g mol <sup>-1</sup> ) | pK <sub>a</sub> <sup>39</sup> |
|-------------|-------------------------------------------------------------------------------------|-----------------------------------|-------------------------------|
| Citalopram  | 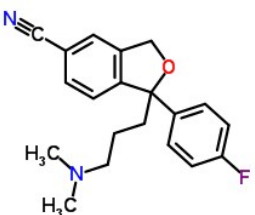  | 324.392                           | 9.78                          |
| Sertraline  |  | 306.229                           | 9.85                          |
| Fluvoxamine |  | 318.355                           | 9.16                          |
| Fluoxetine  |  | 309.32                            | 9.8                           |

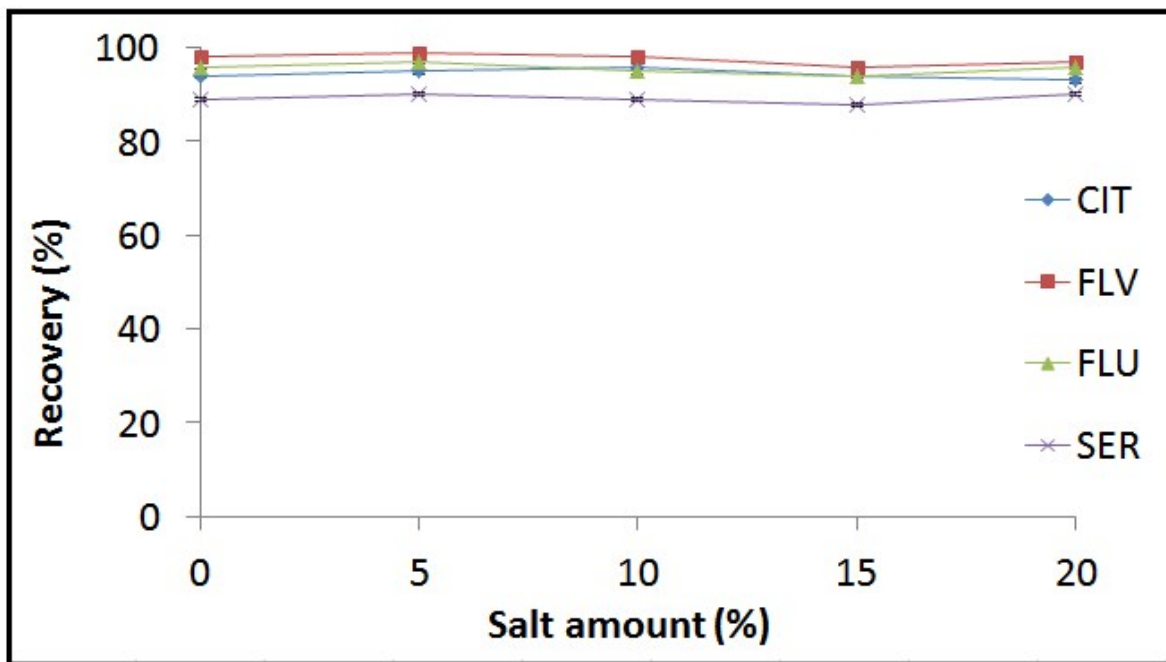

Fig. S1. Effect of salt amount on extraction recovery.

**Table S2** Analysis of variance (ANOVA) for central composite design of SSRIs.

| Analytes    | Source of variation | Sum of square | Df <sup>a</sup> | P- value | R <sup>2</sup> | R <sub>adj</sub> <sup>2</sup> | R <sub>pred</sub> <sup>2</sup> |
|-------------|---------------------|---------------|-----------------|----------|----------------|-------------------------------|--------------------------------|
| Citalopram  | Model               | 2.941E+010    | 9               | < 0.0001 | 0.9991         | 0.9982                        | 0.9960                         |
|             | Residuals           | 2.691E+007    | 9               |          |                |                               |                                |
|             | Lack of fit (LOF)   | 1.209E+007    | 5               | 0.6783   |                |                               |                                |
|             | Pure error          | 1.482E+007    | 4               |          |                |                               |                                |
|             | Total               | 2.946E+010    | 19              |          |                |                               |                                |
| Sertraline  | Model               | 1.040E+011    | 9               | < 0.0001 | 0.9857         | 0.9714                        | 0.9452                         |
|             | Residuals           | 1.507E+009    | 9               |          |                |                               |                                |
|             | Lack of fit (LOF)   | 3.838E+008    | 5               | 0.9063   |                |                               |                                |
|             | Pure error          | 1.124E+009    | 4               |          |                |                               |                                |
|             | Total               | 1.090E+011    | 19              |          |                |                               |                                |
| Fluvoxamine | Model               | 4.461E+010    | 9               | < 0.0001 | 0.9331         | 0.8997                        | 0.7643                         |
|             | Residuals           | 3.198E+009    | 9               |          |                |                               |                                |
|             | Lack of fit (LOF)   | 2.601E+009    | 5               | 0.2358   |                |                               |                                |
|             | Pure error          | 5.972E+008    | 4               |          |                |                               |                                |
|             | Total               | 4.785E+010    | 19              |          |                |                               |                                |
| Fluoxetine  | Model               | 6.192E+008    | 9               | < 0.0001 | 0.9558         | 0.9117                        | 0.8025                         |
|             | Residuals           | 2.861E+007    | 9               |          |                |                               |                                |
|             | Lack of fit (LOF)   | 1.348E+007    | 5               | 0.6465   |                |                               |                                |
|             | Pure error          | 1.514E+007    | 4               |          |                |                               |                                |
|             | Total               | 6.532E+008    | 19              |          |                |                               |                                |

<sup>a</sup> Degrees of freedom

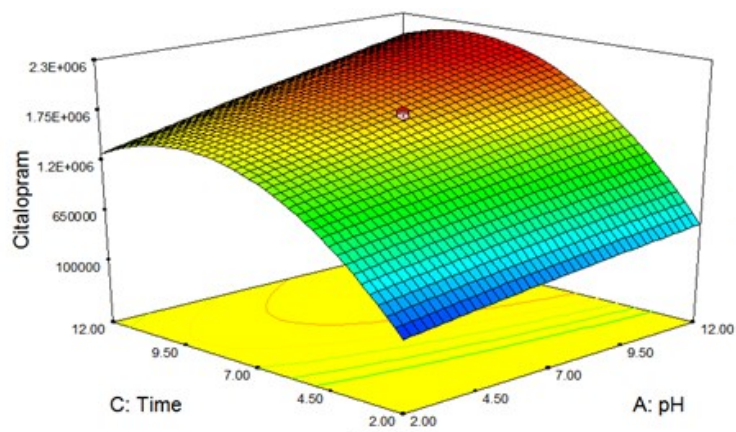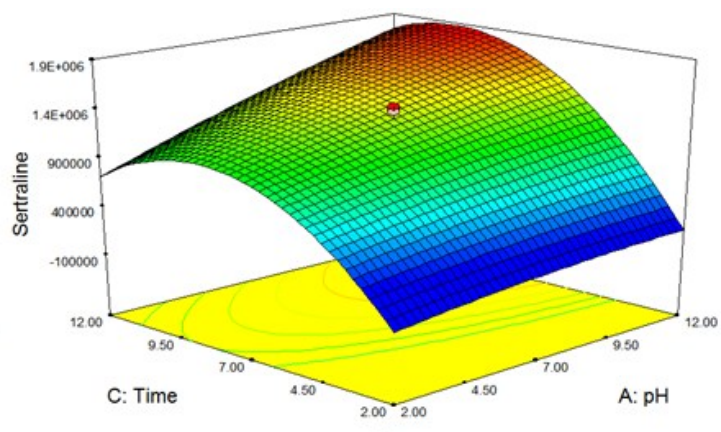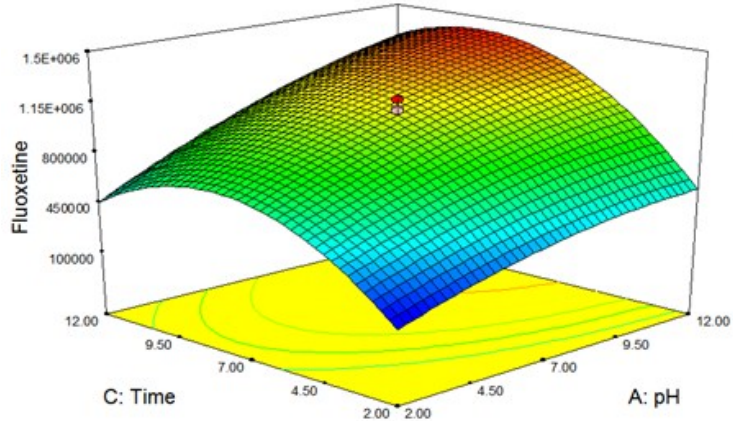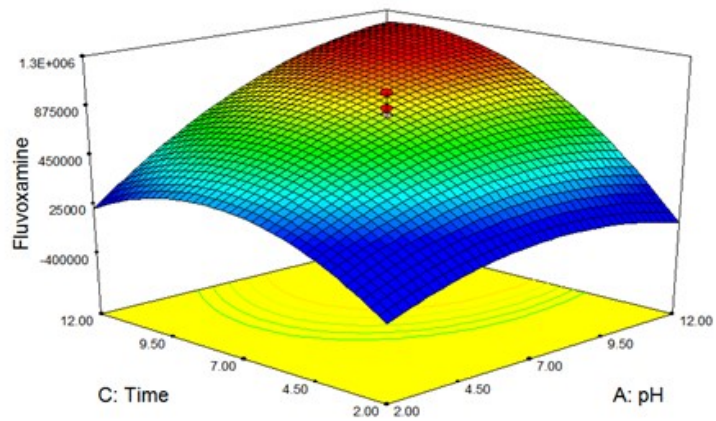

Fig. S2. Response surfaces for CCD based on extraction time vs. pH for analytes. Response value: peak area.

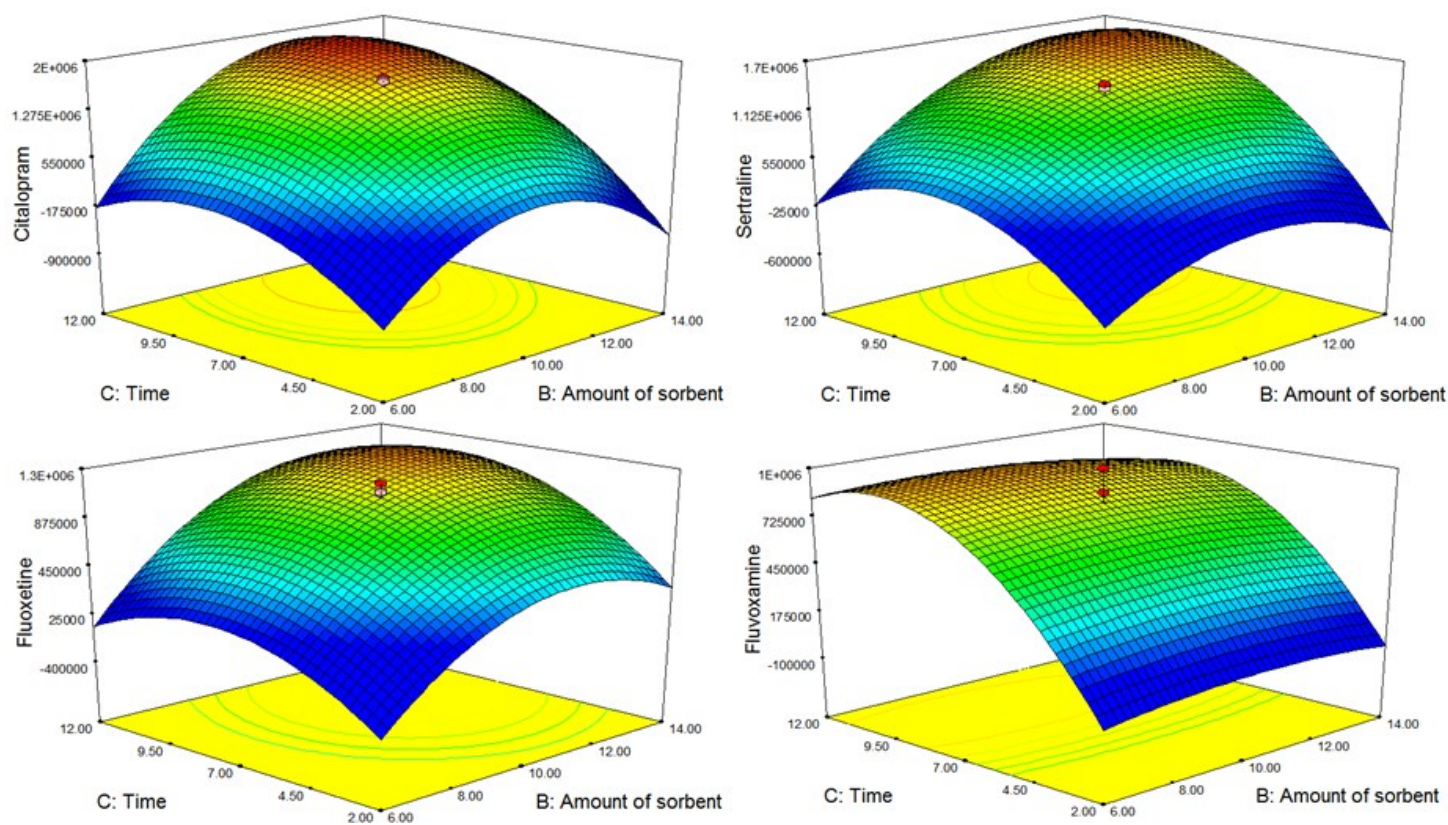

Fig. S3. Response surfaces for CCD based on extraction time vs. amount of sorbent for analytes. Response value: peak area.
